# Supplementary material
Source: PubMed Central journal article supplement (PMC6802261)
Supplement: jama-322-1465-s002.pdf [file jama-322-1465-s002.pdf]

## Supplementary Online Content

Thille AW, Muller G, Gacouin A, et al; HIGH-WEAN Study Group; REVA Research Network. Effect of postextubation high-flow nasal oxygen with noninvasive ventilation vs high-flow nasal oxygen alone on reintubation among patients at high risk of extubation failure: a randomized clinical trial. *JAMA*. doi:10.1001/jama.2019.14901

**eTable 1.** Comparison of Patients Who Met Criteria for Postextubation Respiratory Failure and for Reintubation According to Randomization Group

**eTable 2.** Characteristics of the Patients According to PaCO<sub>2</sub> Level at Baseline

**eTable 3.** Primary and Secondary Outcomes in Hypercapnic Patients (PaCO<sub>2</sub> > 45 mm Hg)

**eTable 4.** Primary and Secondary Outcomes in Nonhypercapnic Patients (PaCO<sub>2</sub> ≤ 45 mm Hg)

**eTable 5.** Number of Patients Included per Center and Reintubation Rates per Center According to Randomization Group

**eFigure.** Kaplan-Meier Curves of the Cumulative Probability of Survival From Extubation to Day 90

This supplementary material has been provided by the authors to give readers additional information about their work.

**eTable 1. Comparison of Patients Who Met Criteria for Postextubation Respiratory Failure and for Reintubation According to Randomization Group**

|                                                              | High-flow nasal oxygen alone (n=302) | High-flow nasal oxygen with NIV (n=339) | P value |
|--------------------------------------------------------------|--------------------------------------|-----------------------------------------|---------|
| <b>Post-extubation respiratory failure at day 7, No. (%)</b> | 88 (29)                              | 70 (21)                                 | .02     |
| - Respiratory rate > 25 breaths per minute, No. (%)          | 74 (24)                              | 63 (19)                                 | .07     |
| - Clinical signs suggesting respiratory distress, No. (%)    | 57 (19)                              | 46 (14)                                 | .07     |
| - Respiratory acidosis, No. (%)                              | 21 (7)                               | 18 (5)                                  | .38     |
| - Hypoxemia, No. (%)                                         | 52 (17)                              | 36 (11)                                 | .02     |
| <b>Reintubation up until ICU discharge, No. (%)</b>          | 59 (20)                              | 41 (12)                                 | .009    |
| <b>Criteria for reintubation</b>                             |                                      |                                         |         |
| - Severe respiratory failure, No. (%)                        | 46 (15)                              | 42 (12)                                 | .30     |
| Respiratory rate > 35 breaths per minute, No. (%)            | 34 (11)                              | 32 (9)                                  | .45     |
| Clinical signs suggesting respiratory distress, No. (%)      | 39 (13)                              | 37 (11)                                 | .43     |
| Respiratory acidosis, No. (%)                                | 12 (4)                               | 9 (3)                                   | .35     |
| Hypoxemia, No. (%)                                           | 24 (8)                               | 19 (6)                                  | .24     |
| - Hemodynamic failure, No. (%)                               | 10 (3)                               | 6 (2)                                   | .21     |
| - Neurological failure, No. (%)                              | 18 (6)                               | 19 (6)                                  | .85     |
| - Respiratory or cardiac arrest, No. (%)                     | 7 (2)                                | 3 (1)                                   | .20     |
| <b>Reasons for reintubation</b>                              |                                      |                                         |         |
| Cardiogenic pulmonary edema, No. (%)                         | 9 (3)                                | 7 (2)                                   | .46     |
| Upper airway obstruction, No. (%)                            | 6 (2)                                | 6 (2)                                   | .84     |
| Aspiration, No. (%)                                          | 1 (0)                                | 2 (1)                                   | .99     |
| Pneumonia, No. (%)                                           | 7 (2)                                | 3 (1)                                   | .14     |
| Atelectasis, No. (%)                                         | 9 (3)                                | 4 (1)                                   | .11     |
| Pleural effusion, No. (%)                                    | 2 (1)                                | 3 (1)                                   | .75     |
| Pneumothorax, No. (%)                                        | 1 (0)                                | 2 (1)                                   | .99     |
| Inability to clear secretions, No. (%)                       | 18 (6)                               | 18 (5)                                  | .72     |
| Ineffective cough, No. (%)                                   | 12 (4)                               | 9 (3)                                   | .35     |
| Weakness of respiratory muscles, No. (%)                     | 15 (5)                               | 9 (3)                                   | .12     |
| Hypoventilation, No. (%)                                     | 0 (0)                                | 2 (1)                                   | .50     |
| Hypercapnic coma, No. (%)                                    | 4 (1)                                | 1 (0)                                   | .14     |
| Septic shock, No. (%)                                        | 4 (1)                                | 1 (0)                                   | .14     |
| Cardiogenic shock, No. (%)                                   | 2 (1)                                | 0 (0)                                   | .22     |
| Hemorrhage, No. (%)                                          | 3 (1)                                | 0 (0)                                   | .07     |
| Neurologic event, No. (%)                                    | 7 (2)                                | 7 (2)                                   | .83     |
| Surgery, No. (%)                                             | 3 (1)                                | 1 (0)                                   | .26     |

**eTable 2. Characteristics of the Patients According to PaCO<sub>2</sub> Level at Baseline**

|                                                              | Non-hypercapnic patients (PaCO <sub>2</sub> ≤ 45 mm Hg) |                                         |         | Hypercapnic patients (PaCO <sub>2</sub> > 45 mm Hg) |                                        |         |
|--------------------------------------------------------------|---------------------------------------------------------|-----------------------------------------|---------|-----------------------------------------------------|----------------------------------------|---------|
|                                                              | High-flow nasal oxygen alone (n=254)                    | High-flow nasal oxygen with NIV (n=276) | P value | High-flow nasal oxygen alone (n=48)                 | High-flow nasal oxygen with NIV (n=63) | P value |
| <b>Characteristics of the patients at admission</b>          |                                                         |                                         |         |                                                     |                                        |         |
| Age, mean (SD), years                                        | 70 (10)                                                 | 69 (10)                                 | .3492   | 70 (9)                                              | 67 (11)                                | .1613   |
| Male sex, No. (%)                                            | 167 (66)                                                | 190 (69)                                | .4481   | 28 (58)                                             | 40 (63)                                | .5805   |
| Body-mass index, mean (SD), kg/m <sup>2</sup>                | 28 (6)                                                  | 28 (7)                                  | .8387   | 31 (7)                                              | 31 (9)                                 | .8397   |
| SAPS II at admission, mean (SD), points <sup>A</sup>         | 56 (18)                                                 | 56 (20)                                 | .9481   | 54 (16)                                             | 51 (19)                                | .4512   |
| <b>Main reason for intubation, No. (%)</b>                   |                                                         |                                         | .8290   |                                                     |                                        | --      |
| Acute respiratory failure                                    | 123 (48)                                                | 126 (46)                                |         | 35 (73)                                             | 41 (65)                                |         |
| Coma                                                         | 47 (19)                                                 | 47 (17)                                 |         | 8 (17)                                              | 10 (16)                                |         |
| Shock                                                        | 27 (11)                                                 | 33 (12)                                 |         | 3 (6)                                               | 4 (6)                                  |         |
| Cardiac arrest                                               | 24 (9)                                                  | 34 (12)                                 |         | 2 (4)                                               | 1 (2)                                  |         |
| Surgery                                                      | 28 (11)                                                 | 28 (10)                                 |         | 0 (0)                                               | 7 (11)                                 |         |
| Other reason                                                 | 5 (2)                                                   | 8 (3)                                   |         | 0                                                   | 0                                      |         |
| <b>Risk factors of extubation failure</b>                    |                                                         |                                         |         |                                                     |                                        |         |
| Age > 65 years, No. (%)                                      | 188 (74)                                                | 199 (72)                                | .6199   | 35 (73)                                             | 38 (60)                                | .1658   |
| Underlying chronic cardiac disease, No. (%) <sup>B</sup>     | 126 (50)                                                | 138 (50)                                | .9278   | 19 (40)                                             | 23 (37)                                | .7407   |
| Ischemic heart disease, n                                    | 66                                                      | 77                                      |         | 12                                                  | 11                                     |         |
| Atrial fibrillation, n                                       | 50                                                      | 35                                      |         | 8                                                   | 10                                     |         |
| Left ventricular dysfunction, n                              | 33                                                      | 46                                      |         | 6                                                   | 6                                      |         |
| History of cardiogenic pulmonary edema, n                    | 17                                                      | 20                                      |         | 4                                                   | 5                                      |         |
| Underlying chronic lung disease, No. (%) <sup>B</sup>        | 54 (21)                                                 | 80 (29)                                 | 0.0409  | 33 (69)                                             | 46 (73)                                | 0.6230  |
| Chronic obstructive pulmonary disease, n                     | 42                                                      | 55                                      |         | 22                                                  | 31                                     |         |
| Obesity-hypoventilation syndrome, n                          | 9                                                       | 7                                       |         | 7                                                   | 13                                     |         |
| Chronic restrictive pulmonary disease, n                     | 7                                                       | 21                                      |         | 5                                                   | 3                                      |         |
| <b>Characteristics of the patients the day of extubation</b> |                                                         |                                         |         |                                                     |                                        |         |
| SOFA score, mean (SD), points <sup>C</sup>                   | 4.3 (2.7)                                               | 4.4 (2.6)                               | .4970   | 3.6 (1.6)                                           | 4.3 (3.1)                              | .1484   |
| Duration of mechanical ventilation, median (IQR), days       | 5 (3–9)                                                 | 6 (3–10)                                | .1319   | 6 (4–10)                                            | 5 (3–12)                               | .4787   |
| Weaning difficulty No. (%) <sup>D</sup>                      |                                                         |                                         | .5533   |                                                     |                                        | .3187   |
| Simple weaning                                               | 177 (70)                                                | 194 (70)                                |         | 26 (54)                                             | 38 (60)                                |         |
| Difficult weaning                                            | 70 (27)                                                 | 70 (25)                                 |         | 22 (46)                                             | 23 (37)                                |         |
| Prolonged weaning                                            | 7 (3)                                                   | 12 (5)                                  |         | 0 (0)                                               | 2 (3)                                  |         |

|                                                                      | Non-hypercapnic patients (PaCO <sub>2</sub> ≤ 45 mm Hg) |                                         |         | Hypercapnic patients (PaCO <sub>2</sub> > 45 mm Hg) |                                        |         |
|----------------------------------------------------------------------|---------------------------------------------------------|-----------------------------------------|---------|-----------------------------------------------------|----------------------------------------|---------|
|                                                                      | High-flow nasal oxygen alone (n=254)                    | High-flow nasal oxygen with NIV (n=276) | P value | High-flow nasal oxygen alone (n=48)                 | High-flow nasal oxygen with NIV (n=63) | P value |
| <b>Ventilator settings before the spontaneous breathing trial</b>    |                                                         |                                         |         |                                                     |                                        |         |
| Assist-control ventilation, No. (%)                                  | 37 (15)                                                 | 45 (16)                                 | .5806   | 5 (10)                                              | 4 (6)                                  | .4367   |
| Pressure-support ventilation, No. (%)                                | 217 (85)                                                | 231 (84)                                | .5806   | 43 (90)                                             | 59 (94)                                | .4367   |
| Pressure-support level, mean (SD), cm H <sub>2</sub> O               | 9.4 (2.7)                                               | 9.2 (3.0)                               | .4147   | 10.4 (2.9)                                          | 9.9 (2.2)                              | .3163   |
| PEEP, mean (SD), cm H <sub>2</sub> O                                 | 5.7 (1.6)                                               | 5.8 (1.5)                               | .1580   | 5.9 (1.7)                                           | 6.0 (1.9)                              | .7207   |
| Tidal volume, mean (SD), ml                                          | 480 (125)                                               | 480 (143)                               | .9664   | 409 (110)                                           | 479 (147)                              | .009    |
| Tidal volume, mean (SD), ml/kg                                       | 7.9 (2.4)                                               | 7.9 (2.5)                               | .9582   | 6.7 (1.6)                                           | 7.7 (2.3)                              | .0086   |
| Respiratory rate, mean (SD), breaths/min                             | 22 (7)                                                  | 22 (6)                                  | .7534   | 23 (6)                                              | 22 (7)                                 | .4974   |
| FiO <sub>2</sub> , mean (SD), %                                      | 34 (9)                                                  | 35 (11)                                 | .3846   | 38 (10)                                             | 37 (10)                                | .7881   |
| PaO <sub>2</sub> :FiO <sub>2</sub> , mean (SD), mm Hg                | 281 (93)                                                | 281 (88)                                | .9926   | 236 (79)                                            | 247 (91)                               | .4927   |
| pH, mean (SD), units                                                 | 7.45 (0.06)                                             | 7.45 (0.05)                             | .6397   | 7.43 (0.05)                                         | 7.43 (0.05)                            | .9343   |
| PaCO <sub>2</sub> , mean (SD), mm Hg                                 | 37 (6)                                                  | 37 (8)                                  | .3584   | 51 (7)                                              | 51 (8)                                 | .6504   |
| <b>Characteristics at the end of the spontaneous breathing trial</b> |                                                         |                                         |         |                                                     |                                        |         |
| T-piece trial, No. (%)                                               | 161 (63)                                                | 172 (62)                                | .7996   | 27 (56)                                             | 34 (54)                                | .8108   |
| Low level of pressure-support, No. (%)                               | 93 (37)                                                 | 104 (38)                                | .7996   | 21 (44)                                             | 29 (46)                                | .8108   |
| Duration, median (IQR), min                                          | 60 (30-60)                                              | 60 (30-60)                              | .5452   | 60 (30-72)                                          | 60 (30-60)                             | .3719   |
| Systolic arterial pressure, mean (SD), mm Hg                         | 135 (21)                                                | 135 (23)                                | .7474   | 140 (20)                                            | 136 (21)                               | .3383   |
| Diastolic arterial pressure, mean (SD), mm Hg                        | 66 (14)                                                 | 68 (16)                                 | .4308   | 71 (13)                                             | 69 (16)                                | .4674   |
| Heart rate, mean (SD), beats/min                                     | 92 (17)                                                 | 91 (18)                                 | .3496   | 90 (19)                                             | 96 (18)                                | .0903   |
| Respiratory rate, mean (SD), breaths/min                             | 23 (6)                                                  | 23 (6)                                  | .2576   | 24 (6)                                              | 23 (7)                                 | .4892   |
| SpO <sub>2</sub> , mean (SD), %                                      | 97 (3)                                                  | 97 (3)                                  | .7770   | 95 (3)                                              | 95 (3)                                 | .9510   |
| PaO <sub>2</sub> , mean (SD), mm Hg                                  | 89 (29)                                                 | 87 (27)                                 | .6288   | 75 (14)                                             | 81 (27)                                | .2201   |
| pH, mean (SD), units                                                 | 7.46 (0.06)                                             | 7.46 (0.05)                             | .4922   | 7.42 (0.04)                                         | 7.43 (0.05)                            | .5496   |
| PaCO <sub>2</sub> , mm Hg                                            | 37 (5)                                                  | 37 (5)                                  | .9777   | 53 (7)                                              | 52 (9)                                 | .4431   |
| Steroids administration before extubation                            | 35 (14)                                                 | 38 (14)                                 | .9970   | 7 (15)                                              | 15 (24)                                | .2270   |
| Ineffective cough, No./total No. (%)                                 | 51/239 (21)                                             | 70/263 (27)                             | .1674   | 14/45 (69)                                          | 16/59 (73)                             | .6561   |
| Abundant secretions, No./total No. (%)                               | 101/242 (42)                                            | 91/265 (34)                             | .0864   | 20/46 (57)                                          | 23/61 (62)                             | .5465   |

**Abbreviations:** NIV = Non-invasive ventilation; SAPS = Simplified Acute Physiology Score; SOFA = Sepsis-related Organ Failure Assessment.

<sup>A</sup> The Simplified Acute Physiology Score (SAPS) II was calculated from 17 variables at admission. Scores range from 0 to 163, with higher scores indicating more severe disease and higher mortality risk.

<sup>B</sup> Patients could have more than one underlying chronic cardiac or lung disease.

<sup>C</sup> The Sepsis-related Organ Failure Assessment (SOFA) was calculated from 6 variables the day of extubation. Scores range from 0 to 24, with higher scores indicating more severe organ failure and higher mortality risk.

<sup>D</sup> Weaning difficulty was defined as following: simple weaning included patients extubated after success of the first spontaneous breathing trial, difficult weaning included patients who failed the first spontaneous breathing trial and were extubated within the 7 following days, and prolonged weaning included patients extubated more than 7 days after the first spontaneous breathing trial.

**eTable 3. Primary and Secondary Outcomes in Hypercapnic Patients (PaCO<sub>2</sub> > 45 mm Hg)**

|                                                                | High-flow nasal oxygen alone (n=48) | High-flow nasal oxygen with NIV (n=63) | Absolute difference (95 CI) | P value      |
|----------------------------------------------------------------|-------------------------------------|----------------------------------------|-----------------------------|--------------|
| <b>Primary outcome</b>                                         |                                     |                                        |                             |              |
| Reintubation at day 7, No. (%)                                 | 10 (21)                             | 5 (8)                                  | -12.9 (-27.1 to -0.1)       | <b>.0489</b> |
| <b>Secondary outcomes</b>                                      |                                     |                                        |                             |              |
| Post-extubation respiratory failure at day 7, No. (%)          | 24 (50)                             | 14 (22)                                | -27.8 (-43.8 to -9.8)       | <b>.0022</b> |
| Reintubation at 48 hours, No. (%)                              | 4 (8)                               | 2 (3)                                  | -5.2 (-16.6 to 4.0)         | .2337        |
| Reintubation at 72 hours, No. (%)                              | 9 (19)                              | 4 (6)                                  | -12.4 (-26.1 to -0.10)      | <b>.0441</b> |
| Reintubation up until ICU discharge, No. (%)                   | 10 (21)                             | 6 (9)                                  | -11.3 (-25.7 to 2.0)        | .0928        |
| Patient meeting reintubation criteria during ICU stay, No. (%) | 11 (23)                             | 7 (11)                                 | -11.8 (-26.5 to 2.1)        | .0946        |
| Length of stay in ICU, median (IQR) days                       | 13 (9–18)                           | 13 (7–20)                              | 0.6 (-4.0 to 5.2)           | .7592        |
| Length of stay in hospital, median (IQR) days                  | 24 (15–29)                          | 26 (15–36)                             | 2.5 (-4.9 to 9.9)           | .4234        |
| Mortality in ICU, No. (%)                                      | 5 (10)                              | 2 (3)                                  | -7.2 (-19.2 to 2.4)         | .1199        |
| Mortality or reintubation in ICU, No. (%)                      | 11 (23)                             | 6 (9)                                  | -13.4 (-27.9 to 0.3)        | .0523        |
| Mortality in ICU of reintubated patients, No. (%)              | 4/10 (40)                           | 2/6 (33)                               | -6.7 (-43.9 to 36.7)        | .9999        |
| Mortality in hospital, No. (%)                                 | 7 (15)                              | 8 (13)                                 | -1.9 (-15.9 to 10.8)        | .7735        |
| Mortality at day 90, No. (%)                                   | 11 (23)                             | 12 (19)                                | -3.9 (-19.6 to 11.0)        | .6183        |

**Abbreviations:** NIV = Non-invasive ventilation; 95 CI = 95% confident interval; ICU = intensive care unit.

**eTable 4. Primary and Secondary Outcomes in Nonhypercapnic Patients (PaCO<sub>2</sub> ≤ 45 mm Hg)**

|                                                                | High-flow nasal oxygen alone (n=254) | High-flow nasal oxygen with NIV (n=276) | Absolute difference (95 CI) | P value      |
|----------------------------------------------------------------|--------------------------------------|-----------------------------------------|-----------------------------|--------------|
| <b>Primary outcome</b>                                         |                                      |                                         |                             |              |
| Reintubation at day 7, No. (%)                                 | 45 (18)                              | 35 (13)                                 | -5.0 (-11.2 to 1.1)         | .1057        |
| <b>Secondary outcomes</b>                                      |                                      |                                         |                             |              |
| Post-extubation respiratory failure at day 7, No. (%)          | 64 (25)                              | 56 (20)                                 | -4.9 (-12.0 to 2.2)         | .1775        |
| Reintubation at 48 hours, No. (%)                              | 32 (13)                              | 22 (8)                                  | -4.6 (-10.0 to 0.6)         | .0785        |
| Reintubation at 72 hours, No. (%)                              | 38 (15)                              | 26 (9)                                  | -5.5 (-11.2 to 0.0)         | .0505        |
| Reintubation up until ICU discharge                            | 49 (19)                              | 35 (13)                                 | -6.6 (-12.9 to -0.4)        | <b>.0374</b> |
| Patient meeting reintubation criteria during ICU stay, No. (%) | 54 (21)                              | 42 (15)                                 | -6.0 (-12.6 to 0.5)         | .0712        |
| Length of stay in ICU, median (IQR), days                      | 11 (7–19)                            | 12 (7–18)                               | 0.5 (-1.8 to 2.8)           | .4087        |
| Length of stay in hospital, median (IQR), days                 | 23 (15–40)                           | 25 (15–43)                              | 2.0 (-2.2 to 6.2)           | .4181        |
| Mortality in ICU, No. (%)                                      | 21 (8)                               | 19 (7)                                  | -1.4 (-6.1 to 3.2)          | .5548        |
| Mortality or reintubation in ICU, No. (%)                      | 53 (21)                              | 45 (16)                                 | -4.6 (-11.2 to 2.1)         | .1766        |
| Mortality in ICU of reintubated patients, No. (%)              | 17/49 (35)                           | 9/35 (26)                               | -8.9 (-27.1 to 11.2)        | .3801        |
| Mortality in hospital, No. (%)                                 | 39 (15)                              | 46 (17)                                 | 1.3 (-5.0 to 7.5)           | .6808        |
| Mortality at day 90, No. (%)                                   | 54 (21)                              | 50 (18)                                 | -3.8 (-9.9 to 3.6)          | .3626        |

**Abbreviations:** NIV = Non-invasive ventilation; ICU = intensive care unit.

**eTable 5. Number of Patients Included per Center and Reintubation Rates per Center According to Randomization Group.**

|              | <b>Reintubation rates per center at day 7</b> | <b>Reintubation rates in the high-flow nasal oxygen alone group</b> | <b>Reintubation rates in the non-invasive ventilation group</b> |
|--------------|-----------------------------------------------|---------------------------------------------------------------------|-----------------------------------------------------------------|
| Center 1     | 1/38 (3%)                                     | 1/19 (5%)                                                           | 0/19 (0%)                                                       |
| Center 2     | 3/32 (9%)                                     | 0/16 (0%)                                                           | 3/16 (19%)                                                      |
| Center 3     | 1/14 (7%)                                     | 0/7 (0%)                                                            | 1/7 (14%)                                                       |
| Center 4     | 5/32 (16%)                                    | 2/15 (13%)                                                          | 3/17 (18%)                                                      |
| Center 5     | 7/13 (54%)                                    | 3/6 (50%)                                                           | 4/7 (57%)                                                       |
| Center 6     | 4/27 (15%)                                    | 2/13 (15%)                                                          | 2/14 (14%)                                                      |
| Center 7     | 6/23 (26%)                                    | 6/10 (60%)                                                          | 0/13 (0%)                                                       |
| Center 8     | 3/12 (25%)                                    | 2/5 (40%)                                                           | 1/7 (14%)                                                       |
| Center 9     | 7/34 (21%)                                    | 5/17 (29%)                                                          | 2/17 (12%)                                                      |
| Center 10    | 2/22 (9%)                                     | 2/10 (20%)                                                          | 0/12 (0%)                                                       |
| Center 11    | 5/24 (21%)                                    | 3/11 (27%)                                                          | 2/13 (15%)                                                      |
| Center 12    | 0/3 (0%)                                      | 0/1 (0%)                                                            | 0/2 (0%)                                                        |
| Center 13    | 5/25 (20%)                                    | 3/12 (25%)                                                          | 2/13 (15%)                                                      |
| Center 14    | 8/24 (33%)                                    | 6/11 (55%)                                                          | 2/13 (15%)                                                      |
| Center 15    | 3/24 (13%)                                    | 2/12 (17%)                                                          | 1/12 (8%)                                                       |
| Center 16    | 4/23 (17%)                                    | 1/10 (10%)                                                          | 3/13 (23%)                                                      |
| Center 17    | 4/25 (16%)                                    | 1/12 (8%)                                                           | 3/13 (23%)                                                      |
| Center 18    | 1/7 (14%)                                     | 1/2 (50%)                                                           | 0/5 (0%)                                                        |
| Center 19    | 0/11 (0%)                                     | 0/5 (0%)                                                            | 0/6 (0%)                                                        |
| Center 20    | 5/48 (10%)                                    | 3/25 (12%)                                                          | 2/23 (9%)                                                       |
| Center 21    | 4/17 (24%)                                    | 1/8 (13%)                                                           | 3/9 (33%)                                                       |
| Center 22    | 1/6 (17%)                                     | 1/2 (50%)                                                           | 0/4 (0%)                                                        |
| Center 23    | 3/40 (8%)                                     | 2/19 (11%)                                                          | 1/21 (5%)                                                       |
| Center 24    | 1/31 (3%)                                     | 1/14 (7%)                                                           | 0/17 (0%)                                                       |
| Center 25    | 0/6 (0%)                                      | 0/3 (0%)                                                            | 0/3 (0%)                                                        |
| Center 26    | 2/21 (10%)                                    | 2/10 (20%)                                                          | 0/11 (0%)                                                       |
| Center 27    | 2/9 (22%)                                     | 1/4 (25%)                                                           | 1/5 (20%)                                                       |
| Center 28    | 4/30 (13%)                                    | 3/14 (21%)                                                          | 1/16 (6%)                                                       |
| Center 29    | 1/4 (25%)                                     | 0/2 (0%)                                                            | 1/2 (50%)                                                       |
| Center 30    | 3/16 (19%)                                    | 1/7 (14%)                                                           | 2/9 (22%)                                                       |
| <b>Total</b> | <b>95/641 (15%)</b>                           | <b>55/302 (18%)</b>                                                 | <b>40/339 (12%)</b>                                             |



**eFigure. Kaplan-Meier Curves of the Cumulative Probability of Survival From Extubation to Day 90.**

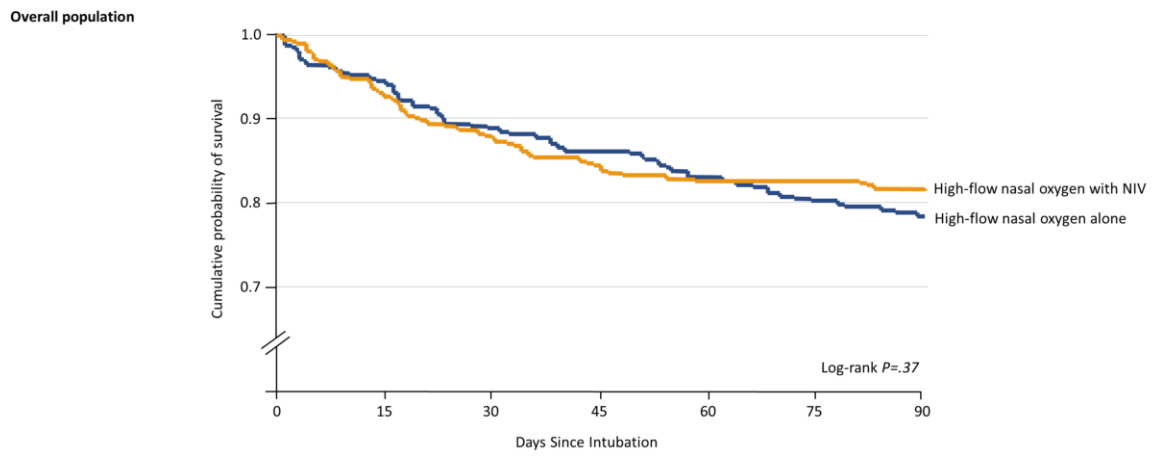

Number at risk

|                                 |     |     |     |     |     |     |     |
|---------------------------------|-----|-----|-----|-----|-----|-----|-----|
| High-flow nasal oxygen alone    | 302 | 284 | 268 | 260 | 251 | 242 | 237 |
| High-flow nasal oxygen with NIV | 339 | 314 | 298 | 286 | 280 | 280 | 277 |
