# Supplementary material
Source: PubMed Central journal article supplement (PMC6802261)
Supplement: jama-322-1465-s003.pdf [file jama-322-1465-s003.pdf]

## **Data Sharing Statement**

Thille. Effect of Postextubation High-Flow Nasal Oxygen With Noninvasive Ventilation vs High-Flow Nasal Oxygen Alone on Reintubation Among Patients at High Risk of Extubation Failure. *JAMA*. Published October 02, 2019. 10.1001/jama.2019.14901

### **Data**

**Data available:** No
